# Supplementary material for: Differential Methylation Profile in Fragile X Syndrome-Prone Offspring Mice after in Utero Exposure to Lactobacillus Reuteri
Source: MDPI journal article supplement (doi:10.3390/genes13081300), 2022-07-22
Supplement: s1 [file s1]

## SUPPLEMENTARY INFORMATION

### Supplementary Figures

**Figure S1.** Overlap of CpGs passed quality control (PassedQC) and with unique best alignment score (UniqueAlign). Only the CpGs with unique best alignment score and passed quality control are used in the analysis to find different methylated CpGs.

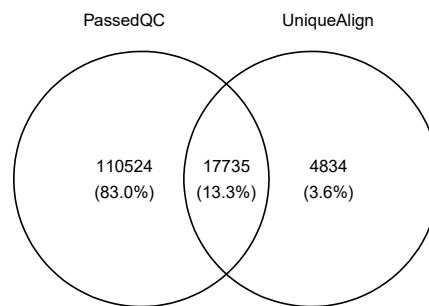

**Figure S2.**  $\beta$  value distribution of (A) all CpGs passed quality control and (B) CpGs passed quality control and with unique best alignment score.

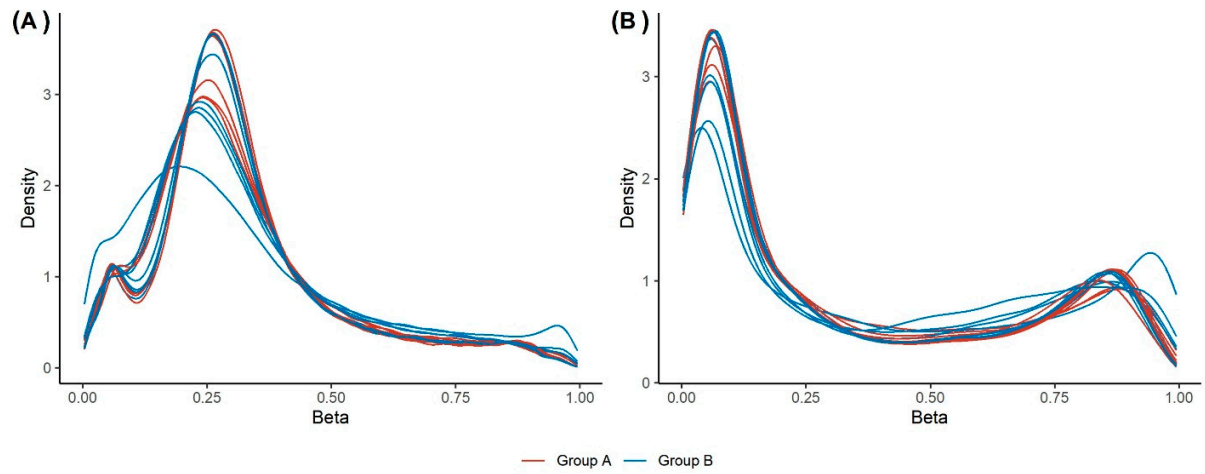

## Supplementary Tables

**Supplementary Table S1.** List of differentially methylated CpG sites and their corresponding genes.

| probeID        | chr | geneSymbol1500  | logFC    | P.Value  |
|----------------|-----|-----------------|----------|----------|
| cg04523291     | 6   | Oxtr            | 0.184336 | 0.484761 |
| cg15317815     | 6   | Oxtr            | -0.3704  | 0.623746 |
| cg02192228     | 6   | Oxtr            | -0.27426 | 0.672402 |
| cg02313829     | 7   | Klhl35          | 1.020785 | 0.002424 |
| cg04830124     | 4   | Casz1           | -0.96639 | 0.003318 |
| cg16113298     | 2   | Pax6            | 2.432251 | 0.004143 |
| cg16776421     | 17  | Rab11fip3       | 3.457276 | 0.004376 |
| cg18861001     | 8   | Zfp423          | 0.577008 | 0.004565 |
| cg09125011     | 2   | Barhl1          | -0.83119 | 0.00462  |
| cg12804010     | 3   | Syt6            | -1.96937 | 0.006188 |
| cg19175742     | 7   | Ap3b2           | -0.68573 | 0.006662 |
| cg02181847     | 13  | Tfap2a          | 2.897984 | 0.007404 |
| cg12827760     | 1   |                 | -0.62317 | 0.007493 |
| cg08102602     | 6   | Ptms            | 2.306798 | 0.007932 |
| cg04665204     | 11  | Bahcc1          | 1.321405 | 0.008311 |
| cg04978747     | 5   | Agap3           | 0.729015 | 0.008324 |
| cg19382919     | 2   | Sp5             | 2.237178 | 0.008451 |
| cg03319479     | 2   |                 | 2.603797 | 0.009032 |
| cg21739318     | 8   | Klhd4;Galnt2l   | 2.373626 | 0.009155 |
| cg17723677     | 12  | Ankrd9          | 0.878877 | 0.009182 |
| cg10187792     | 11  | Rab37           | 2.624925 | 0.009272 |
| cg17553854     | 5   | Epha5           | -0.65265 | 0.009963 |
| cg13874817     | 9   | Spsb4           | -1.15326 | 0.009969 |
| cg06839483     | 4   | Myorg           | 2.702576 | 0.010356 |
| cg26529376     | 2   | Kcnip3          | -1.35701 | 0.010897 |
| cg23646337     | 7   | Tmem145         | -1.00392 | 0.010951 |
| cg07206010     | X   | Trex2           | -0.64557 | 0.01113  |
| cg01824138     | 4   | Casz1           | 2.492807 | 0.011195 |
| cg11937129     | 5   | Tmem120b        | 2.601914 | 0.011328 |
| cg26287163     | 13  |                 | 2.041793 | 0.011419 |
| ch.15.1310449F | 9   | Morf4l1         | 2.272031 | 0.011721 |
| cg14166458     | 4   | Mrto4;Ubr4;Emc1 | 0.578276 | 0.011767 |
| cg01808706     | 2   | Itpka           | -0.76641 | 0.011965 |
| cg00420869     | 11  | Adra1b          | 1.534408 | 0.012092 |
| cg11482571     | 2   | Tfap2c          | -0.74666 | 0.012402 |
| cg13456504     | 5   |                 | -0.52014 | 0.012699 |

|            |    |                        |          |          |
|------------|----|------------------------|----------|----------|
| cg08651034 | 17 | Tmem200c               | 3.051603 | 0.012968 |
| cg04072768 | 11 | Sptbn1                 | -0.67996 | 0.01303  |
| cg03380643 | 2  | Insm1                  | -1.63372 | 0.013074 |
| cg09537448 | 6  |                        | 3.56636  | 0.013169 |
| cg14664922 | 7  | Usp47                  | -0.56938 | 0.0132   |
| cg15755084 | 5  | Msx1                   | 2.231316 | 0.013279 |
| cg19370097 | 16 | Zbtb20                 | 3.317076 | 0.013326 |
| cg17811167 | 11 | Mllt6                  | -0.67076 | 0.013446 |
| cg25536300 | 10 | Ptbp1                  | -0.51927 | 0.013566 |
| cg11078828 | 7  | Clpb                   | 2.273617 | 0.014196 |
| cg05565239 | 12 | Rtn1                   | 2.38777  | 0.014337 |
| cg18567174 | 9  | Skor1                  | -1.40252 | 0.01441  |
| cg05770797 | 11 | Nr1d1                  | -0.85059 | 0.014468 |
| cg07204662 | 19 | Esrra                  | 2.743779 | 0.014506 |
| cg22652733 | 10 | Mcu                    | 2.69605  | 0.014538 |
| cg24775323 | 9  |                        | -2.62253 | 0.014543 |
| cg02063736 | 2  | Rbm39                  | 2.194327 | 0.014561 |
| cg21321248 | 5  | Kcnh2                  | 2.665116 | 0.014691 |
| cg16069003 | 3  | Rsrc1                  | -0.83167 | 0.014712 |
| cg15827532 | 5  | Lrch4;Gm20605          | -0.77403 | 0.014823 |
| cg27598576 | 15 | Atf7;Gm28047           | 2.197171 | 0.014941 |
| cg02474076 | 6  | Gcc1                   | 1.832169 | 0.014957 |
| cg13090987 | 7  | Slco3a1                | -0.55961 | 0.015011 |
| cg14769525 | 2  |                        | -0.66983 | 0.015028 |
| cg19504123 | 11 | Rab34                  | -0.58855 | 0.015178 |
| cg02368058 | 5  |                        | -0.85374 | 0.015206 |
| cg02453348 | 7  | Xntrpc;Trpc2;Xnd<br>c1 | -0.62145 | 0.015269 |
| cg22617643 | 1  | Rpl7;Rdh10             | 1.828795 | 0.015278 |
| cg07298473 | 2  | Nr1h3                  | 1.509187 | 0.015588 |
| cg01501208 | 7  | Nr2f2                  | 2.294977 | 0.015598 |
| cg10614025 | 7  | Ap3b2                  | -0.75483 | 0.015638 |
| cg00795277 | 11 | Fgf11                  | 2.331615 | 0.015782 |
| cg05486213 | 2  | Mpped2                 | 1.759267 | 0.015818 |
| cg16468913 | X  | Cd40lg                 | -0.56999 | 0.01601  |
| cg09157431 | 11 | Pafah1b1               | 2.665805 | 0.016204 |
| cg23114866 | 2  | Nkx2-2                 | 2.701786 | 0.016272 |
| cg23333820 | 19 | Psd                    | 2.107466 | 0.016469 |
| cg02296807 | 9  | Atg4d                  | 0.671568 | 0.016516 |
| cg19425477 | 9  | Lingo1                 | -0.59893 | 0.016531 |
| cg09675845 | 7  | Dlg2                   | 2.839827 | 0.016552 |

|            |    |              |          |          |
|------------|----|--------------|----------|----------|
| cg19802138 | 8  | Sox1         | 2.192066 | 0.016762 |
| cg13239348 | 7  |              | -0.76917 | 0.016808 |
| cg01311718 | 1  | Ikzf2        | 2.30294  | 0.01681  |
| cg10170306 | 2  | Arpc5l       | 3.069299 | 0.016869 |
| cg16734637 | 6  | Foxp1        | -0.64361 | 0.016892 |
| cg14421309 | 2  | Zeb2         | 2.236837 | 0.016901 |
| cg06295260 | 2  | Duox1        | 1.946971 | 0.017016 |
| cg20332660 | 4  |              | 2.015952 | 0.017503 |
| cg03620623 | 7  | Ap2a1        | -0.71569 | 0.017813 |
| cg07249939 | 17 | C2;Zbtb12    | -0.58475 | 0.017939 |
| cg21501358 | 18 | Klhl14       | 1.766403 | 0.018023 |
| cg19853848 | 18 | Sting1       | 0.7154   | 0.01804  |
| cg01181227 | 5  | Nkx1-1       | 2.159131 | 0.018086 |
| cg17520144 | 11 | Dhrs11       | 2.526551 | 0.018143 |
| cg24002886 | 10 | Col6a1       | 1.616632 | 0.018324 |
| cg07060175 | 11 | Tenm2        | 2.200879 | 0.018332 |
| cg05007549 | 5  | Prdm8        | 2.82459  | 0.018558 |
| cg03669936 | 17 | Fbxo11       | -0.66907 | 0.018693 |
| cg22373415 | 9  | Smad6        | -0.49945 | 0.01902  |
| cg22424903 | 17 | Tead3        | 2.382026 | 0.019099 |
| cg06887471 | 6  | Zfp777       | -1.14782 | 0.019156 |
| cg08296191 | 15 | Shank3       | 1.642875 | 0.019285 |
| cg16194588 | 7  | Lmtk3        | -0.83297 | 0.019347 |
| cg03743119 | 9  | Smad6        | -0.84152 | 0.019556 |
| cg10433594 | 10 | Cited2       | 2.050123 | 0.019614 |
| cg19619003 | 4  | Foxo6        | 2.258653 | 0.019767 |
| cg02756545 | 3  | Abcd3        | -0.61713 | 0.019818 |
| cg16642517 | 5  | Rbm47        | -0.60463 | 0.020173 |
| cg15172734 | 14 | Slmap        | 0.895535 | 0.020331 |
| cg03536289 | 12 | Asb2         | -0.64765 | 0.020352 |
| cg26780404 | 9  | Col12a1      | 1.982699 | 0.020414 |
| cg20390613 | 4  | Dhrs3        | -0.99101 | 0.020456 |
| cg18267374 | 14 | Nefm         | 1.535546 | 0.02053  |
| cg26073720 | 5  |              | 1.968082 | 0.020686 |
| cg03122669 | 15 | Hoxc9;Hoxc5  | -0.48616 | 0.020791 |
| cg16984132 | 9  | Sidt2        | -1.12145 | 0.02093  |
| cg05493495 | 9  | Peak1;Hmg20a | -0.65556 | 0.021144 |
| cg07819065 | 11 | Septin4      | 2.27893  | 0.021195 |
| cg07342016 | X  | Rab33a       | 2.08166  | 0.021407 |
| cg04431387 | 15 | Phf5a;Aco2   | 1.536859 | 0.021553 |
| cg13770291 | 13 |              | 2.19203  | 0.021615 |

|            |   |    |                                  |          |          |
|------------|---|----|----------------------------------|----------|----------|
| cg15416233 |   | 19 | Pax2                             | 2.057116 | 0.021619 |
| cg06225294 |   | 16 | Zbtb20                           | 2.670956 | 0.021754 |
| cg06566772 |   | 10 | Arid5b                           | -0.87675 | 0.021804 |
| cg15663265 |   | 8  | Dnase2a;Mast1                    | 2.803789 | 0.02189  |
| cg24156613 | X |    | Bcor                             | -0.66785 | 0.02192  |
| cg21285133 |   | 1  |                                  | 2.025302 | 0.022039 |
| cg07035165 |   | 18 | Kcnn2                            | 2.850647 | 0.022118 |
| cg19084362 |   | 3  | Insrr;Pear1                      | 2.558831 | 0.022178 |
| cg10573553 |   | 10 | Dip2a                            | -1.83138 | 0.022206 |
| cg04289959 |   | 7  | Fbrs                             | -2.02808 | 0.022248 |
| cg16944597 |   | 16 | Fam131a                          | -0.51397 | 0.022269 |
| cg16464569 |   | 4  | Fhl3                             | 2.196882 | 0.022409 |
| cg01651290 |   | 7  | Dusp8                            | -0.8178  | 0.022469 |
| cg03437025 |   | 15 | Sp1                              | 1.66144  | 0.022546 |
| cg27400113 |   | 11 | Meis1                            | 1.69064  | 0.022674 |
| cg00147172 |   | 15 |                                  | -0.62588 | 0.022753 |
| cg07014673 |   | 1  |                                  | 2.199832 | 0.022791 |
| cg11881754 |   | 5  | Srrm3                            | -2.09956 | 0.023028 |
| cg16039964 |   | 11 | Rnasek;0610010K<br>14Rik;Gm21988 | -0.72949 | 0.02305  |
| cg13352750 |   | 6  | Hoxa11                           | -1.98004 | 0.023074 |
| cg01469884 |   | 6  | Tril                             | 1.824439 | 0.023096 |
| cg19186380 |   | 15 | Hoxc5                            | 2.91683  | 0.023385 |
| cg14848832 |   | 3  | Efna3                            | 1.079247 | 0.023434 |
| cg10649367 |   | 18 | Zfp521                           | 1.510501 | 0.023571 |
| cg08029967 |   | 2  | Olfr1195                         | 1.335881 | 0.023655 |
| cg06392318 |   | 10 | Rspo3                            | 2.086661 | 0.023791 |
| cg04419618 | X |    | RbmX                             | 1.598277 | 0.023807 |
| cg16423747 |   | 11 | Nf2                              | -0.56957 | 0.023867 |
| cg03272508 |   | 19 | Sf1                              | 1.772008 | 0.023885 |
| cg12616720 | X |    | Nkrf                             | 1.977865 | 0.023937 |
| cg06312785 |   | 9  | Ppp2r3a                          | -0.53217 | 0.023978 |
| cg03341655 |   | 8  | Gfod2                            | 0.719992 | 0.024007 |
| cg24636368 |   | 11 | Skap1                            | 1.97862  | 0.024099 |
| cg02651788 | X |    | Arx                              | 1.740141 | 0.02433  |
| cg17933765 |   | 1  | Rabif                            | -0.70964 | 0.02434  |
| cg06626750 |   | 11 | Srsf1                            | 2.135296 | 0.024373 |
| cg06082962 |   | 19 |                                  | 2.884829 | 0.024537 |
| cg10441013 |   | 1  | Kcnj10                           | 2.334909 | 0.024633 |
| cg22904096 |   | 1  | Myl1                             | -0.5163  | 0.024716 |
| cg01640150 |   | 1  | Vcpi1                            | 2.265291 | 0.024822 |

|            |   |    |                           |          |          |
|------------|---|----|---------------------------|----------|----------|
| cg05823643 |   | 11 | Dynll2                    | 1.535811 | 0.024908 |
| cg22821358 |   | 1  |                           | -0.63558 | 0.025048 |
| cg04653627 |   | 17 | Col11a2                   | -0.56186 | 0.025142 |
| cg24626752 |   | 14 | Slitrk5                   | -0.55847 | 0.02544  |
| cg20381092 |   | 11 | Sp6                       | 1.855437 | 0.025482 |
| cg25353120 |   | 19 | Arl3                      | -0.43884 | 0.025482 |
| cg17009731 |   | 17 | Prrc2a                    | 1.99474  | 0.025621 |
| cg14473568 |   | 16 | Robo2                     | 1.685054 | 0.025634 |
| cg25987923 |   | 19 | Emx2                      | -0.59499 | 0.025636 |
| cg14322166 | X |    | Nlgn3                     | 1.391869 | 0.025738 |
| cg08779207 |   | 2  | Plcb2                     | 0.778785 | 0.025895 |
| cg10254000 |   | 16 | Tbx1                      | 2.459305 | 0.02604  |
| cg05067991 |   | 5  | Kdm2b                     | 1.137273 | 0.026048 |
| cg05942831 |   | 8  | Zfp703                    | -0.57884 | 0.026187 |
| cg25520488 |   | 11 | Tanc2                     | -0.52405 | 0.026256 |
| cg26688315 |   | 1  |                           | -0.86551 | 0.026274 |
| cg06759265 |   | 4  | Dlgap3                    | -2.62187 | 0.026313 |
| cg04616652 |   | 1  | Hmcn1                     | 2.158481 | 0.02644  |
| cg02187816 |   | 3  | Elf2                      | 2.31534  | 0.026447 |
| cg11097249 |   | 11 | Tenm2                     | -1.07153 | 0.026531 |
| cg19781843 |   | 4  | Ncdn                      | 0.432567 | 0.026584 |
| cg21743182 |   | 5  | Cdk14                     | 2.932356 | 0.026873 |
| cg24027179 |   | 11 | Myh10                     | -0.67677 | 0.027022 |
| cg08393828 |   | 12 | Ppp2r5c                   | -0.58697 | 0.027081 |
| cg05469614 |   | 17 | Zscan10                   | 1.642401 | 0.027253 |
| cg02856606 |   | 4  | Iffo2                     | 1.458523 | 0.027255 |
| cg08948849 |   | 9  | Ankdd1a                   | 1.876079 | 0.027354 |
| cg03035653 | X |    | Pcdh19                    | -1.21918 | 0.027428 |
| cg13886231 |   | 15 | Gga1                      | 0.583402 | 0.027539 |
| cg27647370 |   | 15 | Tcf20                     | 2.163175 | 0.0276   |
| cg10363915 |   | 2  | Zdhhc5                    | 0.797301 | 0.027622 |
| cg15554875 |   | 17 | Six2                      | -0.85318 | 0.027675 |
| cg13248877 |   | 16 | Tnk2                      | 1.728833 | 0.027688 |
| cg06767010 |   | 9  | Spsb4                     | 2.567862 | 0.027713 |
| cg11316904 |   | 6  |                           | -0.75723 | 0.027796 |
| cg06206603 |   | 14 | Sec24c                    | 1.7641   | 0.027859 |
| cg07069878 |   | 9  | Stag1                     | 2.131334 | 0.027905 |
| cg15279476 |   | 10 | A930033H14Rik;R<br>hobtb1 | 0.663279 | 0.028054 |
| cg25734680 |   | 13 | Zmynd11                   | -1.36966 | 0.028151 |
| cg06910048 |   | 9  | Pih1d2;Nkapd1             | 2.209947 | 0.028295 |

|            |    |               |          |          |
|------------|----|---------------|----------|----------|
| cg02153528 | 10 | Ankrd52;Nabp2 | -0.69989 | 0.028302 |
| cg02511809 | 18 | Apc           | -1.16468 | 0.028457 |
| cg00399596 | 6  |               | -1.30062 | 0.028467 |
| cg12045059 | 9  | Nlrx1         | 1.833991 | 0.028672 |
| cg14785750 | 1  | St18          | 1.847807 | 0.028725 |
| cg05223760 | X  | Foxp3;Ppp1r3f | -0.42098 | 0.028798 |
| cg06053959 | 11 | Tlcd2         | -0.68596 | 0.028992 |
| cg01655356 | 7  | Shank2        | -0.6903  | 0.028996 |
| cg22441074 | 11 | Mnt           | 1.708174 | 0.029066 |
| cg00314427 | 7  | Fosb          | 2.425453 | 0.029162 |
| cg21027282 | 12 | Rad51b        | -0.79248 | 0.029277 |
| cg24727620 | 5  | Tmem243;Dmtf1 | -0.63932 | 0.029359 |
| cg12815918 | 5  | Pdx1          | 1.919855 | 0.029397 |
| cg11381282 | 14 | Gjb2          | 1.226515 | 0.029423 |
| cg01391538 | 4  | Trnp1         | -0.45672 | 0.029475 |
| cg08554115 | 11 | 6330403K07Rik | -0.53656 | 0.029608 |
| cg17451978 | 9  | Ccdc13        | -1.4302  | 0.029701 |
| cg20460154 | 3  | Alpk1         | 1.612764 | 0.029749 |
| cg01204606 | 9  |               | -0.62511 | 0.029908 |
| cg13045637 | 12 | Prkch         | 1.898537 | 0.029929 |
| cg17553300 | 14 | Wnt5a         | -0.48268 | 0.029954 |
| cg00494665 | 10 | Tbc1d30       | 1.969182 | 0.030016 |
| cg17026973 | 11 | Wdpcp         | 0.682991 | 0.030018 |
| cg01789705 | 7  | Gtf3c1        | 1.986237 | 0.030079 |
| cg11700230 | 17 | Col11a2       | 2.609239 | 0.030104 |
| cg15713282 | 9  |               | 1.541953 | 0.030145 |
| cg04203883 | 15 | Hoxc11        | 1.685362 | 0.030216 |
| cg10251328 | 11 | Igf2bp1       | 1.975449 | 0.030398 |
| cg25517592 | 8  | Zfp827        | 1.506392 | 0.03041  |
| cg10882692 | 4  | Kif1b         | 2.302598 | 0.030428 |
| cg22138822 | 5  | Pole          | 2.163065 | 0.030512 |
| cg01743962 | 11 | Rai1          | 2.296861 | 0.030539 |
| cg19974474 | 10 | Gdf11         | -0.87172 | 0.030573 |
| cg10428279 | 2  | Gabpb1        | 2.35727  | 0.030695 |
| cg16001135 | 5  | Adap1         | -1.12402 | 0.030905 |
| cg11164537 | 11 | Zkscan17      | -2.19332 | 0.031025 |
| cg24142850 | 8  |               | 2.030971 | 0.031177 |
| cg23671921 | 11 | Ccdc88a       | -0.84747 | 0.031371 |
| cg06410537 | 11 | Tlx3          | -0.82893 | 0.03148  |
| cg17140476 | 2  | Ccdc32        | 1.434967 | 0.031526 |
| cg14568422 | 18 | Tcf4          | -0.56162 | 0.031543 |



|            |    |                                                                                                                                                                                                                                    |          |          |
|------------|----|------------------------------------------------------------------------------------------------------------------------------------------------------------------------------------------------------------------------------------|----------|----------|
| cg15597945 | 6  | Lrp6                                                                                                                                                                                                                               | -0.53101 | 0.031653 |
| cg09703759 | 2  | Nsmf                                                                                                                                                                                                                               | -0.54674 | 0.031658 |
| cg16764637 | 6  | Gm28308;Hoxa6;<br>Hoxa3                                                                                                                                                                                                            | 1.817616 | 0.031809 |
| cg03877957 | 11 |                                                                                                                                                                                                                                    | 2.402941 | 0.031877 |
| cg10229294 | 5  | Lhx5                                                                                                                                                                                                                               | 1.878838 | 0.031896 |
| cg18200760 | 3  | Ntng1                                                                                                                                                                                                                              | 1.841689 | 0.031922 |
| cg05811612 | 7  | Bicra                                                                                                                                                                                                                              | 1.949487 | 0.031946 |
| cg20654074 | 2  | Dll4                                                                                                                                                                                                                               | 1.636187 | 0.031983 |
| cg25019126 | 3  | Elovl6                                                                                                                                                                                                                             | 1.910309 | 0.031993 |
| cg23774780 | 1  | Cdc42bpa                                                                                                                                                                                                                           | 1.910866 | 0.032138 |
| cg04580151 | 4  | Faah                                                                                                                                                                                                                               | 0.821237 | 0.032428 |
| cg10471976 | 11 | Rundc3a                                                                                                                                                                                                                            | 2.530395 | 0.032466 |
| cg15477011 | 6  | Gm20696;Foxp1                                                                                                                                                                                                                      | -0.72633 | 0.032554 |
| cg03234775 | 17 | Agpat1                                                                                                                                                                                                                             | 2.261016 | 0.032577 |
| cg09595163 | 14 | Wnt5a                                                                                                                                                                                                                              | -0.70146 | 0.032611 |
| cg12713525 | 2  | Mpped2                                                                                                                                                                                                                             | 1.924898 | 0.032611 |
| cg14841796 | 17 | Gabbr1                                                                                                                                                                                                                             | 2.261918 | 0.032623 |
| cg26878182 | 2  |                                                                                                                                                                                                                                    | 1.386508 | 0.032624 |
| cg10030162 | 8  | Zfp423                                                                                                                                                                                                                             | 1.973902 | 0.032675 |
| cg13067005 | 2  | Ube2e3                                                                                                                                                                                                                             | -1.23184 | 0.032703 |
| cg20403876 | 6  | Dctn1                                                                                                                                                                                                                              | 2.019048 | 0.032747 |
| cg12537546 | 11 | Rnasek;0610010K<br>14Rik;Gm21988                                                                                                                                                                                                   | 1.954066 | 0.032759 |
| cg16409838 | 15 | Septin3                                                                                                                                                                                                                            | -0.89042 | 0.032795 |
| cg16262623 | 11 | Ubtf                                                                                                                                                                                                                               | 1.956235 | 0.032824 |
| cg24806294 | 15 | Scrt1                                                                                                                                                                                                                              | 1.954433 | 0.032907 |
| cg12688234 | 11 | Insyn2b;Dock2                                                                                                                                                                                                                      | 0.47316  | 0.032947 |
| cg24024424 | 18 | Pcdhgb7;Gm4241<br>6;Pcdhgc3;Pcdhg<br>a5;Gm37388;Pcd<br>hga11;Pcdhga6;P<br>cdhgb4;Pcdhga12<br>;Pcdhgb6;Gm370<br>13;Pcdhga3;Pcdh<br>ga7;Pcdhga4;Pcd<br>hga9;Pcdhga1;Pc<br>dhga8;Pcdhga10;<br>Pcdhgb1;Pcdhga2<br>;Pcdhgb5;Pcdhgb<br>2 | 2.396577 | 0.033041 |
| cg02577985 | 5  |                                                                                                                                                                                                                                    | -0.62032 | 0.033231 |

|            |    |               |          |          |
|------------|----|---------------|----------|----------|
| cg15259986 | 2  | Fign          | 1.840343 | 0.033252 |
| cg22402261 | 4  | Ncdn          | 2.036832 | 0.03339  |
| cg04212619 | 6  | Slc6a6        | 1.708033 | 0.033426 |
| cg14542590 | 12 | Foxn3         | 1.764257 | 0.033535 |
| cg18849004 | 2  | Fmn1          | -0.95307 | 0.033543 |
| cg04402966 | 5  | Dbf4;Slc25a40 | -0.56425 | 0.033549 |
| cg26820000 | 4  | Nfyc          | -0.54098 | 0.03359  |
| cg24678862 | 13 | Irx1          | 1.007134 | 0.0336   |
| cg05090186 | 1  | Zbtb18        | -0.54969 | 0.033662 |
| cg02913140 | 13 | Mef2c         | 2.189952 | 0.03403  |
| cg09093100 | 4  | Rnf220        | -0.4934  | 0.034075 |
| cg00513735 | 13 | Hk3;Unc5a     | 0.3956   | 0.034124 |
| cg19081437 | 11 | Hoxb4         | 1.810101 | 0.034138 |
| cg16178942 | 8  | Arhgef7       | 1.975601 | 0.034188 |
| cg07819688 | 5  | Fosl2         | -1.59106 | 0.034196 |
| cg26921093 | 11 | Axin2         | 2.337295 | 0.034224 |
| cg05949352 | 2  | Prdm11        | -0.96624 | 0.034264 |
| cg00871390 | 5  | Atg9b         | 2.246687 | 0.034267 |
| cg00445443 | 6  | Hoxa2;Gm28308 | 1.567558 | 0.034328 |
| cg20392607 | 6  | Kcna1         | 1.725726 | 0.034349 |
| cg14764542 | 5  | Ppp1cb        | -0.47103 | 0.034427 |
| cg04875128 | 7  | Otud7a        | -0.50466 | 0.034473 |
| cg22286687 | 11 | Hexim2        | 0.703714 | 0.034483 |
| cg06835212 | 13 | Mef2c         | -0.56536 | 0.034525 |
| cg04941520 | 8  | Atxn1l        | 2.452002 | 0.03457  |
| cg21418679 | 1  | Fbxo36;Trip12 | -0.92377 | 0.034637 |
| cg17599620 | 9  | Clasp2        | 2.480497 | 0.034686 |
| cg04074140 | 9  | Col12a1       | 1.619798 | 0.034777 |
| cg26238975 | 12 |               | -2.45071 | 0.034794 |
| cg07680319 | 2  |               | 1.458069 | 0.034982 |
| cg21386952 | 1  | Col6a3        | -0.56457 | 0.034997 |
| cg24030086 | 5  | Kmt5a         | 1.741675 | 0.035016 |
| cg16032050 | 14 | Prrxl1        | 0.566578 | 0.03509  |
| cg10448436 | 2  | Pax6          | 2.454045 | 0.035192 |
| cg20418711 | 16 | Runx1         | -0.48492 | 0.035524 |
| cg03982541 | 12 | Brf1          | 1.967336 | 0.035546 |
| cg15929451 | 6  | Foxp1         | 1.329787 | 0.035575 |
| cg19338524 | 5  | Nkx1-1        | 2.391119 | 0.035602 |
| cg06414929 | 2  |               | 1.742138 | 0.035628 |
| cg20908614 | 9  | Atp2c1        | 2.155909 | 0.035702 |
| cg03697509 | 7  | Stard10       | 1.896703 | 0.035935 |

|            |    |               |          |          |
|------------|----|---------------|----------|----------|
| cg09910967 | 10 | Heca          | -0.50893 | 0.035978 |
| cg16872560 | 6  | Ppp1r9a       | 1.870555 | 0.036152 |
| cg23398076 | 11 | Meis1         | 1.898709 | 0.036269 |
| cg11589723 | 7  | Bicra         | 1.873304 | 0.036295 |
| cg06822120 | 5  | Nat8l         | 1.915494 | 0.0364   |
| cg15797110 | 6  | Hoxa7         | 1.752735 | 0.036424 |
| cg00313219 | 19 | 9930021J03Rik | 1.760916 | 0.036538 |
| cg03304815 | 9  | Amotl2        | 1.392802 | 0.036579 |
| cg14733594 | 15 | Dab2          | 1.584526 | 0.036596 |
| cg14948714 | 11 | Patz1         | -0.56682 | 0.03669  |
| cg26813561 | 5  | Acad10        | 2.175321 | 0.036772 |
| cg14086160 | 1  | Igsf9;Tagln2  | -0.74014 | 0.036797 |
| cg05913638 | 9  | Dscaml1       | -0.96001 | 0.036843 |
| cg14665326 | 10 | Plxnc1        | 1.979496 | 0.036918 |
| cg07879727 | 11 | Wnt3          | 1.731227 | 0.037039 |
| cg04637372 | 4  | Vwa5b1        | -0.49079 | 0.037045 |
| cg07906484 | 2  | Hnf4a         | 1.65938  | 0.037217 |
| cg27359731 | 7  | Erfl          | -0.48033 | 0.037241 |
| cg12492753 | 15 | Kmt2d         | 1.862386 | 0.037263 |
| cg19697359 | 4  | Epha8         | 1.755918 | 0.037297 |
| cg17536413 | 4  | Hectd3        | -0.88023 | 0.037312 |
| cg20059876 | 4  | Grik3         | -1.47202 | 0.037449 |
| cg21177673 | 4  | Dab1          | 1.918809 | 0.03756  |
| cg00575115 | 2  | Pcif1;Zfp335  | 2.154654 | 0.037585 |
| cg20184165 | 3  | Naa15         | 1.918196 | 0.03766  |
| cg16787065 | 19 | Ovol1         | 2.422299 | 0.037739 |
| cg26884359 | 11 | Zfp385c       | 1.430583 | 0.037748 |
| cg25797455 | 5  | Tsc22d4       | -2.07189 | 0.037772 |
| cg09940360 | 17 | Ttbk1         | -0.51169 | 0.037779 |
| cg05835276 | 10 | Nxph4         | 2.51479  | 0.037782 |
| cg24791025 | 3  |               | -0.40767 | 0.037793 |
| cg27458485 | 10 | Anks1b        | 2.296618 | 0.037838 |
| cg16383389 | 3  | Bcar3         | -0.63336 | 0.037852 |
| cg02171705 | X  |               | 1.586473 | 0.037861 |
| cg17047659 | 6  | Hoxa10;Hoxa11 | 1.935169 | 0.037974 |
| cg20065832 | X  | Pou3f4        | -0.73969 | 0.038005 |
| cg12001120 | 1  | Wnt10a        | 0.597434 | 0.038152 |
| cg14385804 | 1  | Mff           | 2.445702 | 0.038175 |
| cg06063729 | 9  | Rassf1        | 1.867808 | 0.038181 |
| cg06541294 | 9  | Msl2          | 1.664525 | 0.038246 |
| cg14846463 | 6  | Wnt7a         | -0.58431 | 0.038315 |

|               |   |    |               |          |          |
|---------------|---|----|---------------|----------|----------|
| cg19080590    |   | 8  | Cdh13         | -0.46512 | 0.038364 |
| cg15815114    | X |    | Cul4b         | -0.63203 | 0.038389 |
| cg02119494    |   | 9  |               | 1.863657 | 0.038531 |
| cg03256465    |   | 4  | Jun           | -0.62068 | 0.038532 |
| cg20511797    |   | 2  | Abl1          | 1.709022 | 0.038554 |
| cg21448057    |   | 14 | Slitrk1       | -0.61341 | 0.038709 |
| cg07601212    |   | 12 |               | 2.339174 | 0.03885  |
| cg22310240    |   | 13 | H2ac12;H2bc12 | 1.733738 | 0.038915 |
| cg14433153    |   | 13 |               | 1.889507 | 0.039001 |
| cg11614389    |   | 13 | Ssbp2         | 1.674648 | 0.039021 |
| cg01305421    |   | 10 | Igf1          | -0.87565 | 0.039034 |
| cg20961037    |   | 11 |               | 1.646058 | 0.039046 |
| cg10381455    |   | 15 | Figl2         | -0.52515 | 0.039079 |
| cg17511933    |   | 1  | Gli2          | -0.53178 | 0.039124 |
| cg12244464    |   | 15 | Gga1          | -0.45221 | 0.039125 |
| cg18305324    |   | 17 | Prrc2a        | 1.628956 | 0.039145 |
| cg04813639    |   | 9  | Rasgrf1       | 2.050192 | 0.039155 |
| cg04868764    |   | 2  | Spint1        | -0.48578 | 0.039366 |
| cg12072393    |   | 16 | Dvl3          | 0.665338 | 0.039388 |
| cg24118894    |   | 7  |               | 2.080453 | 0.039397 |
| cg09400281    |   | 12 | Eml1          | -0.48859 | 0.039463 |
| cg23150604    |   | 6  |               | 1.98671  | 0.039483 |
| cg05146658    |   | 1  | Agap1         | 2.60674  | 0.039489 |
| cg22120094    |   | 15 | Zhx2          | 0.951318 | 0.039611 |
| cg04557908    |   | 4  |               | 1.889449 | 0.039646 |
| cg25553110    |   | 15 | Zhx2          | -1.11794 | 0.039669 |
| cg18355562    |   | 13 |               | -0.65879 | 0.039685 |
| cg08933237    |   | 6  | Magi1         | -0.42995 | 0.039724 |
| cg08540100    |   | 4  |               | 1.990581 | 0.039726 |
| cg00713286    |   | 11 | Rap1gap2      | -0.49287 | 0.03984  |
| cg26168324    |   | 19 | Emx2          | 2.368946 | 0.039922 |
| cg24032214    |   | 7  | Leng1;Cnot3   | -2.50475 | 0.039959 |
| cg05059566    |   | 5  | Prdm8         | 1.444865 | 0.040029 |
| cg01951459    |   | 1  | Agap1         | -1.97016 | 0.040098 |
| cg13328485    |   | 2  | Ubr3          | 0.546452 | 0.04015  |
| cg11688073    |   | 8  | Tent4b        | 1.768226 | 0.040187 |
| ch.20.829586R |   | 2  |               | 2.098125 | 0.040228 |
| cg07851057    |   | 13 | Bdp1          | -0.63187 | 0.040632 |
| cg17844121    |   | 6  | Ppp1r3a       | 1.933004 | 0.040652 |
| cg08900073    |   | 9  | Bcl9l         | -0.76757 | 0.040686 |
| cg15336196    |   | 18 | Setbp1        | 1.43452  | 0.04073  |

|            |    |                        |          |          |
|------------|----|------------------------|----------|----------|
| cg01506917 | 17 |                        | 2.150766 | 0.040731 |
| cg06398166 | 9  | Gmppb;lp6k1            | -1.04919 | 0.040764 |
| cg09894929 | 6  | Nxph1                  | -0.85616 | 0.040803 |
| cg14996807 | 9  | Unc13c                 | -1.63113 | 0.0409   |
| cg20786058 | 13 | Fst                    | 1.930786 | 0.040924 |
| cg17124583 | 2  | Gata3                  | -0.63451 | 0.04093  |
| cg00109797 | 8  | Helt                   | -1.4113  | 0.040986 |
| cg11067405 | 12 |                        | 2.174638 | 0.04099  |
| cg03586128 | 7  | Dock1                  | -0.66373 | 0.041019 |
| cg07790870 | 2  | Cbfa2t2                | 1.418216 | 0.041074 |
| cg21059834 | 5  |                        | 0.484826 | 0.041082 |
| cg24599205 | 3  | Kcnc4                  | -0.43274 | 0.041141 |
| cg11556846 | 1  |                        | 1.471209 | 0.0412   |
| cg19317565 | 10 | Syn3                   | 1.136407 | 0.041276 |
| cg12690246 | 15 | Aqp5                   | -0.68011 | 0.041305 |
| cg22336337 | 1  | St18                   | 1.84722  | 0.041507 |
| cg01443426 | 15 | H1f0                   | 1.591349 | 0.041527 |
| cg02991558 | 9  |                        | 2.131406 | 0.041637 |
| cg14175580 | 1  | Camsap2                | 2.273818 | 0.041765 |
| cg24352736 | 9  | Timm29;Yipf2;Car<br>m1 | 1.652526 | 0.041823 |
| cg26413942 | 18 | Zfp608                 | 1.727224 | 0.041921 |
| cg24372550 | 1  | Epha4                  | 1.863367 | 0.041929 |
| cg19210770 | 1  | Asic4                  | -1.45023 | 0.041932 |
| cg04068518 | 12 |                        | 2.172538 | 0.041952 |
| cg09604618 | 2  | Mpped2                 | 2.118858 | 0.042041 |
| cg24005685 | 3  | Pitx2                  | 1.894964 | 0.042128 |
| cg02951021 | 9  |                        | 1.818004 | 0.042241 |
| cg21573538 | 2  | Gchfr                  | -0.5314  | 0.042253 |
| cg08504765 | 8  |                        | 1.666345 | 0.042316 |
| cg03181473 | 4  | Trabd2b                | 1.382602 | 0.042367 |
| cg15648389 | 15 | Hoxc4                  | 1.785791 | 0.042398 |
| cg25266232 | 18 | Dcc                    | 2.194403 | 0.042414 |
| cg10752869 | 2  | Meis2                  | 0.536204 | 0.042424 |
| cg15412759 | 1  | Tfap2d                 | 1.997425 | 0.042446 |
| cg11171004 | 1  |                        | 1.582684 | 0.042525 |
| cg15966253 | 14 | Ube2e1                 | -0.45379 | 0.042593 |
| cg09895223 | X  | Chrdl1                 | -0.82057 | 0.042672 |
| cg11413800 | 8  | Mast1                  | 1.324687 | 0.042676 |
| cg06990796 | 11 | Wwc1                   | -0.50218 | 0.042707 |
| cg19302474 | 4  |                        | 1.369852 | 0.04275  |

|            |    |                     |          |          |
|------------|----|---------------------|----------|----------|
| cg19156483 | 2  | Fign                | -0.59788 | 0.042784 |
| cg11383981 | 14 | Lrtm1;Cacna2d3      | 1.52071  | 0.042794 |
| cg22921453 | 18 | Fem1c               | -0.47156 | 0.042868 |
| cg20014398 | 2  | Pax6                | 1.88392  | 0.042884 |
| cg04017326 | 19 | Pik3ap1             | 0.656249 | 0.042972 |
| cg25136495 | 6  | Lpar5               | 1.790008 | 0.042989 |
| cg20034190 | 11 |                     | 1.947702 | 0.043058 |
| cg21157465 | 4  | Gm572               | 1.698363 | 0.043067 |
| cg08218445 | 16 | Mb21d2              | 1.865705 | 0.043107 |
| cg27004639 | 12 | Ttc7b               | 1.764511 | 0.043143 |
| cg03681150 | 7  | Mvp                 | 0.400738 | 0.043168 |
| cg23575668 | 16 | Hic2                | 0.55703  | 0.043247 |
| cg16473184 | 11 | Rnf43               | -0.45391 | 0.04329  |
| cg08640766 | 2  | Rbm12;Cpne1;Gm28036 | 0.587349 | 0.043305 |
| cg00034468 | 8  | Acta1;Galnt2l       | 1.780738 | 0.043336 |
| cg07017063 | 13 | Fst                 | -0.66921 | 0.043413 |
| cg18712755 | 17 | Prrc2a              | 0.620619 | 0.043469 |
| cg07060006 | 9  | Foxb1               | -0.51146 | 0.043476 |
| cg02836529 | 2  | Neurod1;Cerkl       | 1.809015 | 0.043586 |
| cg23388714 | 18 | Mbd2                | -0.39827 | 0.043626 |
| cg12451099 | 2  | Slc32a1             | 1.899538 | 0.043698 |
| cg17633639 | 9  | Dnajc13             | 1.248481 | 0.043712 |
| cg23944405 | 2  | Mpped2              | 1.751666 | 0.043739 |
| cg12792180 | 11 | Rbfox3              | 1.794542 | 0.044175 |
| cg27537199 | 4  |                     | -0.72909 | 0.044206 |
| cg08551218 | 17 | Lrrc73              | 1.905974 | 0.044218 |
| cg16775971 | 3  | Cxxc4               | 2.138436 | 0.044219 |
| cg19711800 | 4  | Eri3                | 1.921025 | 0.044251 |
| cg19148866 | 17 | Six3                | 1.676823 | 0.044266 |
| cg01219811 | 8  | Nutf2               | -0.40263 | 0.044294 |
| cg24337081 | 2  | Nup188              | 0.542791 | 0.044312 |
| cg06084952 | 7  | Fbxl19;Orai3        | -0.55052 | 0.044374 |
| cg05818894 | 2  | Bdnf                | -0.53653 | 0.044413 |
| cg13034943 | 5  | Ulk1                | -0.60759 | 0.044597 |
| cg23493031 | 12 | Nkx2-1              | 2.005044 | 0.04461  |
| cg13999774 | 1  | Arpc2               | -0.49668 | 0.04468  |
| cg01614615 | 4  | Prdm2               | 1.591133 | 0.044682 |
| cg17132446 | 6  | Hoxa4;Gm28308;Hoxa3 | 1.724845 | 0.044725 |
| cg27397943 | 3  | Zbtb10              | -0.75874 | 0.044738 |

|              |    |                  |          |          |
|--------------|----|------------------|----------|----------|
| cg01488084   | 1  | Map2             | 1.600741 | 0.04477  |
| cg21824343   | 11 | Wdr81            | 1.005485 | 0.0448   |
| cg02007933   | 8  | Galnt2l;Spata2l  | -0.75865 | 0.044809 |
| cg13870374   | 13 | Tent4a;Nsun2     | -0.9131  | 0.044873 |
| cg01153660   | 15 | Hoxc5;Hoxc6      | -0.72061 | 0.044894 |
| cg12432010   | 6  | lqsec3           | 1.661977 | 0.045003 |
| cg20384231   | 7  |                  | 1.321872 | 0.04501  |
| cg13432391   | 9  | Dnm2             | 1.738626 | 0.045045 |
| cg14947478   | 2  | Gdf5             | 1.949043 | 0.045079 |
| ch.2.800013F | 17 | Birc6            | 1.671454 | 0.04518  |
| cg14903727   | 19 | Hnrnpul2;Gm50139 | 1.894697 | 0.045197 |
| cg20917552   | 16 |                  | -0.6598  | 0.045405 |
| cg07435294   | 19 | Ovol1            | 1.917568 | 0.045505 |
| cg25082847   | 14 | Fezf2            | -0.42839 | 0.045536 |
| cg01572267   | 4  | Elavl2           | 1.770203 | 0.045553 |
| cg12440751   | 6  | Kcna1            | 1.548934 | 0.045585 |
| cg01579950   | 19 | Nrxn2            | -2.61939 | 0.045585 |
| cg06030056   | 8  | Sall1            | -0.98984 | 0.045627 |
| cg01272629   | 8  |                  | 1.658747 | 0.045684 |
| cg26264232   | 6  | Hoxa2            | -1.25055 | 0.04576  |
| cg07268058   | 9  | Isl2             | 1.879311 | 0.045765 |
| cg05693527   | 6  | Foxp1            | -2.10183 | 0.045813 |
| cg07197230   | 6  | Cecr2            | 1.674893 | 0.045991 |
| cg22992913   | 10 | Agap2            | 1.639591 | 0.046011 |
| cg13026772   | 9  | Pknox2           | 1.763148 | 0.046024 |
| cg08214610   | X  | Nkrf             | 1.936289 | 0.046082 |
| cg09663101   | 16 | Pi4ka;Snap29     | -0.60183 | 0.046084 |
| cg02690316   | 7  | Fkrp;Strn4       | 1.709258 | 0.046112 |
| cg27067760   | 12 |                  | 1.486021 | 0.046118 |
| cg14165096   | 1  | Agap1            | -0.98191 | 0.046122 |
| cg22639787   | 2  | Gnas             | 0.867703 | 0.046125 |
| cg01923523   | 4  | Lrrc47           | 1.86272  | 0.046188 |
| cg10588135   | 11 | Bcas3            | 2.16123  | 0.046225 |
| cg14726968   | 4  | Zcchc7           | 2.177397 | 0.046265 |
| cg18001714   | 15 | Ank              | -0.53889 | 0.04639  |
| cg06815950   | 5  | Cux2             | -0.54721 | 0.046421 |
| cg10537807   | 11 |                  | 1.812633 | 0.046459 |
| cg19688796   | 1  |                  | -0.50181 | 0.046511 |
| cg08448701   | 2  | Pax1             | 1.968507 | 0.046571 |
| cg20360212   | 11 | Lif              | 2.001268 | 0.046585 |

|            |    |                |          |          |
|------------|----|----------------|----------|----------|
| cg21836062 | X  |                | 1.764269 | 0.046605 |
| cg06506831 | 6  | Hoxa10         | 1.687729 | 0.046706 |
| cg14325160 | 4  | Rad23b         | 2.010611 | 0.046712 |
| cg13023638 | 2  | Kcnq2          | 1.828046 | 0.046737 |
| cg20883310 | 10 | Nuak1          | 1.786093 | 0.046868 |
| cg06655377 | 8  | Bbs2           | 1.821538 | 0.047158 |
| cg15463484 | 7  | Osbp15         | -0.63433 | 0.047198 |
| cg01939220 | 6  | Magi1          | -0.56636 | 0.047214 |
| cg05712938 | 13 |                | 1.205772 | 0.04725  |
| cg12631713 | 4  | Ajap1          | -0.74788 | 0.04731  |
| cg27604944 | 14 | Dach1          | 2.109185 | 0.047368 |
| cg20525279 | 8  | Tenm3          | 2.044864 | 0.047382 |
| cg06024079 | 11 | Ftsj3;Psmc5    | 1.539153 | 0.04741  |
| cg02184281 | 18 | Smad7          | 1.547632 | 0.047526 |
| cg15445628 | 2  | Zmynd19        | 1.96616  | 0.047548 |
| cg21129531 | 6  | Snd1;Lrrc4     | 1.82637  | 0.047666 |
| cg01106201 | 12 | Arhgap5        | 1.147819 | 0.047688 |
| cg27579480 | 8  | Jund           | 1.535786 | 0.04769  |
| cg12603946 | 4  | Esrp1          | 2.105054 | 0.047726 |
| cg14533651 | 6  | Grin2b         | -1.66124 | 0.047744 |
| cg21884062 | 3  | Mab21l1;Nbea   | 0.559718 | 0.047749 |
| cg19445457 | 7  | Olfr503        | 1.999738 | 0.047771 |
| cg24805681 | 7  | Mex3b          | 2.030146 | 0.047774 |
| cg22143274 | 13 |                | 1.470173 | 0.04779  |
| cg24536394 | 16 | Son;Gart       | 1.809962 | 0.047817 |
| cg17311022 | 16 | Gm21987;Popdc2 | 2.379785 | 0.047826 |
| cg09549726 | 7  | Gabrb3         | -1.97963 | 0.047874 |
| cg14485809 | 19 | Lbx1           | 1.443352 | 0.047875 |
| cg06547959 | 18 | Celf4          | 1.71646  | 0.047882 |
| cg18236665 | 7  | B9d2;Tgfb1     | -1.49129 | 0.047997 |
| cg19142001 | 2  | Plcg1;Zhx3     | -0.54763 | 0.048099 |
| cg17122748 | 6  | Plxna4         | 1.765868 | 0.048101 |
| cg23665778 | 7  | Dock1          | 1.612687 | 0.048115 |
| cg10858898 | 11 | Thra           | 1.838694 | 0.048147 |
| cg06654549 | 13 |                | 2.047623 | 0.048156 |
| cg14215077 | 2  | Src            | 1.720079 | 0.048186 |
| cg07620968 | 8  | Mmp15          | -0.5697  | 0.048349 |
| cg11534937 | 5  | Tnrc18         | -1.07198 | 0.048363 |
| cg01745428 | 2  | Nol4l          | -2.11842 | 0.048451 |
| cg25811820 | 2  | Plagl2;Pofut1  | 1.462741 | 0.048565 |
| cg04645545 | 19 | Fgf8           | -1.98915 | 0.048614 |



|            |    |                         |          |          |
|------------|----|-------------------------|----------|----------|
| cg12666411 | 3  | Pogz                    | 2.126774 | 0.048645 |
| cg20876248 | 11 | Eml6                    | -0.52908 | 0.048663 |
| cg08549648 | 11 | Tenm2                   | -0.48234 | 0.048698 |
| cg27311392 | X  | Tsc22d3                 | -0.53191 | 0.048702 |
| cg19236263 | X  | Trappc2;Ofd1            | 1.488897 | 0.048735 |
| cg14940223 | X  | Armcx3                  | 2.614923 | 0.048824 |
| cg27359557 | 16 | Lpp                     | 0.777628 | 0.048832 |
| cg20469625 | 15 | Zfpm2                   | 1.95247  | 0.04891  |
| cg16626764 | 12 | Ttc7b                   | 1.850314 | 0.048945 |
| cg15367487 | 7  | Eif4g2                  | -1.7439  | 0.048945 |
| cg01152019 | 2  | Gm28230;Hoxd3;<br>Hoxd4 | 1.353798 | 0.049026 |
| cg18580296 | 12 | Meox2                   | 2.202355 | 0.049105 |
| cg15364618 | 14 | Ltb4r2                  | 1.773441 | 0.049117 |
| cg04998317 | 17 |                         | 1.761079 | 0.049153 |
| cg24980994 | 14 | Zfp503                  | 1.330146 | 0.049166 |
| cg19918027 | 16 | Kalrn                   | 2.072572 | 0.049289 |
| cg09735869 | 5  | Rgs12                   | 1.902714 | 0.04931  |
| cg24591182 | 19 | Plcb3                   | -1.46789 | 0.049312 |
| cg03717442 | 17 | Six3                    | -0.50267 | 0.049442 |
| cg04118306 | 14 | Nefm                    | 1.421107 | 0.049629 |
| cg13107760 | 2  | Zfp804a                 | 1.902453 | 0.049674 |
| cg01746550 | 11 |                         | 1.994309 | 0.049802 |
| cg08611491 | 2  | Jag1                    | 1.450637 | 0.049849 |
| cg03671597 | 11 | Sez6                    | 1.532499 | 0.049968 |

**Supplementary Table S2.** List of significant gene ontology pathways of three main categories, biological processes (BP), Cellular components (CC) and Molecular Functions (MF).

| ID         | category | description                                                                              | count | zScore   | p-value  |
|------------|----------|------------------------------------------------------------------------------------------|-------|----------|----------|
| GO:0006919 | BP       | GO_BP_MM_ACTIVATION_OF_CYSTEINETYPE_ENDOPEPTIDASE_ACTIVITY_INVOLVED_IN_APOPTOTIC_PROCESS | 15    | -0.2582  | 0.001647 |
| GO:0042147 | BP       | GO_BP_MM_RETROGRADE_TRANSPORT_ENDOSOME_TO_GOLGI                                          | 7     | 0        | 0.002485 |
| GO:0071549 | BP       | GO_BP_MM_CELLULAR_RESPONSE_TO_DEXAMETHASONE_STIMULUS                                     | 5     | 0        | 0.003545 |
| GO:0030901 | BP       | GO_BP_MM_MIDBRAIN_DEVELOPMENT                                                            | 22    | 1.788854 | 0.004751 |
| GO:0000050 | BP       | GO_BP_MM_UREA_CYCLE                                                                      | 5     | -1       | 0.005125 |
| GO:0043406 | BP       | GO_BP_MM_POSITIVE_REGULATION_OF_MAP_KINASE_ACTIVITY                                      | 21    | 0        | 0.005739 |
| GO:0016881 | MF       | GO_MF_MM_ACID-AMINO_ACID_LIGASE_ACTIVITY                                                 | 38    | 0.68599  | 0.006501 |
| GO:0030139 | CC       | GO_CC_MM_ENDOCYTIC_VESICLE                                                               | 11    | 0.70711  | 0.007548 |
| GO:0016311 | BP       | GO_BP_MM_DEPHOSPHORYLATION                                                               | 50    | 0.617213 | 0.008449 |
| GO:0008093 | MF       | GO_MF_MM_CYTOSKELETAL_ADAPTOR_ACTIVITY                                                   | 7     | 0.377964 | 0.00884  |
| GO:0001892 | BP       | GO_BP_MM_EMBRYONIC_PLACENTA_DEVELOPMENT                                                  | 16    | 1        | 0.009087 |
| GO:0072357 | CC       | GO_CC_MM_PTW_PP1_PHOSPHATASE_COMPLEX                                                     | 5     | 0.447214 | 0.009362 |
| GO:0008601 | MF       | GO_MF_MM_PROTEIN_PHOSPHATASE_TYPE_2A_REGULATOR_ACTIVITY                                  | 10    | 1.666667 | 0.010126 |
| GO:0006470 | BP       | GO_BP_MM_PROTEIN_DEPHOSPHORYLATION                                                       | 64    | 0.412082 | 0.010375 |
| GO:0005614 | CC       | GO_CC_MM_INTERSTITIAL_MATRIX                                                             | 7     | 1.34164  | 0.010479 |

|            |    |                                                                  |    |              |          |
|------------|----|------------------------------------------------------------------|----|--------------|----------|
| GO:0009378 | MF | GO_MF_MM_FOUR-WAY_JUNCTION_HELICASE_ACTIVITY                     | 7  | -<br>1.13389 | 0.011259 |
| GO:0044255 | BP | GO_BP_MM_CELLULAR_LIPID_METABOLIC_PROCESS                        | 5  | 1.341641     | 0.011319 |
| GO:0006520 | BP | GO_BP_MM_CELLULAR_AMINO_ACID_METABOLIC_PROCESS                   | 9  | -<br>1.63299 | 0.011831 |
| GO:0034450 | MF | GO_MF_MM_UBIQUITIN-UBIQUITIN_LIGASE_ACTIVITY                     | 6  | -<br>1.63299 | 0.011858 |
| GO:0030100 | BP | GO_BP_MM_REGULATION_OF_ENDOCYTOSIS                               | 9  | 0.377964     | 0.011977 |
| GO:0016791 | MF | GO_MF_MM_PHOSPHATASE_ACTIVITY                                    | 56 | 1.179536     | 0.012434 |
| GO:0043525 | BP | GO_BP_MM_POSITIVE_REGULATION_OF_NEURON_APOPTOTIC_PROCESS         | 19 | 1.697749     | 0.013272 |
| GO:0032508 | BP | GO_BP_MM_DNA_DUPLEX_UNWINDING                                    | 6  | 1.341641     | 0.014576 |
| GO:0017137 | MF | GO_MF_MM_RAB_GTPASE_BINDING                                      | 17 | 0.242536     | 0.015292 |
| GO:0050729 | BP | GO_BP_MM_POSITIVE_REGULATION_OF_INFLAMMATORY_RESPONSE            | 5  | 0            | 0.015485 |
| GO:0006378 | BP | GO_BP_MM_MRNA_POLYADENYLATION                                    | 11 | 2.110579     | 0.015515 |
| GO:0055001 | BP | GO_BP_MM_MUSCLE_CELL_DEVELOPMENT                                 | 5  | -1           | 0.015805 |
| GO:0035239 | BP | GO_BP_MM_TUBE_MORPHOGENESIS                                      | 5  | -<br>1.41421 | 0.015841 |
| GO:0035914 | BP | GO_BP_MM_SKELETAL_MUSCLE_CELL_DIFFERENTIATION                    | 8  | 0            | 0.015971 |
| GO:0019722 | BP | GO_BP_MM_CALCIUM-MEDIATED_SIGNALING                              | 13 | -<br>0.57735 | 0.016049 |
| GO:0032720 | BP | GO_BP_MM_NEGATIVE_REGULATION_OF_TUMOR_NECROSIS_FACTOR_PRODUCTION | 7  | -<br>0.8165  | 0.016719 |
| GO:0006309 | BP | GO_BP_MM_APOPTOTIC_DNA_FRAGMENTATION                             | 5  | 0            | 0.017118 |

|            |    |                                                              |    |              |          |
|------------|----|--------------------------------------------------------------|----|--------------|----------|
| GO:0032147 | BP | GO_BP_MM_ACTIVATION_OF_PROTEIN_KINASE_ACTIVITY               | 9  | -<br>1.41421 | 0.017602 |
| GO:0016887 | MF | GO_MF_MM_ATPASE_ACTIVITY                                     | 53 | -<br>0.14907 | 0.017808 |
| GO:0004842 | MF | GO_MF_MM_UBIQUITIN-PROTEIN_LIGASE_ACTIVITY                   | 99 | 1.393746     | 0.019417 |
| GO:0017069 | MF | GO_MF_MM_SNRNA_BINDING                                       | 5  | 1            | 0.019589 |
| GO:0030224 | BP | GO_BP_MM_MONOCYTE_DIFFERENTIATION                            | 9  | 1.414214     | 0.020505 |
| GO:0043169 | MF | GO_MF_MM_CATION_BINDING                                      | 6  | -<br>0.8165  | 0.020554 |
| GO:0033280 | BP | GO_BP_MM_RESPONSE_TO_VITAMIN_D                               | 10 | 0.333333     | 0.021061 |
| GO:0003148 | BP | GO_BP_MM_OUTFLOW_TRACT_SEPTUM_MORPHOGENESIS                  | 9  | 0.707107     | 0.021203 |
| GO:0035413 | BP | GO_BP_MM_POSITIVE_REGULATION_OF_CATENIN_IMPORT_INTO_NUCLEUS  | 5  | -<br>1.34164 | 0.021657 |
| GO:0016829 | MF | GO_MF_MM_LYASE_ACTIVITY                                      | 8  | -<br>0.70711 | 0.022199 |
| GO:0008143 | MF | GO_MF_MM_POLYA_RNA_BINDING                                   | 7  | 1.133893     | 0.022727 |
| GO:0014911 | BP | GO_BP_MM_POSITIVE_REGULATION_OF_SMOOTH_MUSCLE_CELL_MIGRATION | 6  | -<br>2.23607 | 0.023303 |
| GO:0034707 | CC | GO_CC_MM_CHLORIDE_CHANNEL_COMPLEX                            | 16 | 0.258199     | 0.02331  |
| GO:0060216 | BP | GO_BP_MM_DEFINITIVE_HEMOPOIESIS                              | 10 | 0.632456     | 0.023373 |
| GO:0008373 | MF | GO_MF_MM_SIALYLTRANSFERASE_ACTIVITY                          | 9  | 0.707107     | 0.023503 |
| GO:0007018 | BP | GO_BP_MM_MICROTUBULE-BASED_MOVEMENT                          | 28 | -<br>0.40825 | 0.024463 |
| GO:0045647 | BP | GO_BP_MM_NEGATIVE_REGULATION_OF_ERYTHROCYTE_DIFFERENTIATION  | 5  | 1.341641     | 0.025107 |

|            |    |                                                                                           |    |          |          |
|------------|----|-------------------------------------------------------------------------------------------|----|----------|----------|
| GO:0003678 | MF | GO_MF_MM_DNA_HELICASE_ACTIVITY                                                            | 5  | 2        | 0.026183 |
| GO:0031982 | CC | GO_CC_MM_VESICLE                                                                          | 8  | 1.414214 | 0.026305 |
| GO:0048037 | MF | GO_MF_MM_COFACTOR_BINDING                                                                 | 7  | 0.816497 | 0.026396 |
| GO:0017111 | MF | GO_MF_MM_NUCLEOSIDE-TRIPHOSPHATASE_ACTIVITY                                               | 46 | -0.52223 | 0.02643  |
| GO:0043235 | CC | GO_CC_MM_RECEPTOR_COMPLEX                                                                 | 11 | 1.414214 | 0.027581 |
| GO:0010977 | BP | GO_BP_MM_NEGATIVE_REGULATION_OF_NEURON_PROJECTION_DEVELOPMENT                             | 16 | 1.069045 | 0.027728 |
| GO:0071397 | BP | GO_BP_MM_CELLULAR_RESPONSE_TO_CHOLESTEROL                                                 | 5  | 2.236068 | 0.028226 |
| GO:0030301 | BP | GO_BP_MM_CHOLESTEROL_TRANSPORT                                                            | 6  | 2        | 0.02862  |
| GO:0046827 | BP | GO_BP_MM_POSITIVE_REGULATION_OF_PROTEIN_EXPORT_FROM_NUCLEUS                               | 5  | 1.732051 | 0.028647 |
| GO:0010165 | BP | GO_BP_MM_RESPONSE_TO_X-RAY                                                                | 8  | -1.13389 | 0.028792 |
| GO:0033116 | CC | GO_CC_MM_ENDOPLASMIC_RETICULUM - GOLGI_INTERMEDIATE_COMPARTMENT_MEMBRANE                  | 10 | -0.63246 | 0.02952  |
| GO:0042787 | BP | GO_BP_MM_PROTEIN_UBIQUITINATION_INVOLVED_IN_UBIQUITIN-DEPENDENT_PROTEIN_CATABOLIC_PROCESS | 23 | -0.22942 | 0.03014  |
| GO:0030658 | CC | GO_CC_MM_TRANSPORT_VESICLE_MEMBRANE                                                       | 8  | -1.34164 | 0.031128 |
| GO:0051209 | BP | GO_BP_MM_RELEASE_OF_SEQUESTERED_CALCIIUM_ION_INTO_CYTOSOL                                 | 11 | 2.110579 | 0.031877 |
| GO:0008277 | BP | GO_BP_MM_REGULATION_OF_G-PROTEIN_COUPLED_RECEPTOR_PROTEIN_SIGNALING_PATHWAY               | 16 | -0.90453 | 0.032528 |
| GO:0060389 | BP | GO_BP_MM_PATHWAY-RESTRICTED_SMAD_PROTEIN_PHOSPHORYLATION                                  | 9  | 0        | 0.033879 |

|             |    |                                                                    |    |          |          |
|-------------|----|--------------------------------------------------------------------|----|----------|----------|
| GO:0042162  | MF | GO_MF_MM_TELOMERIC_DNA_BINDING                                     | 6  | 0.816497 | 0.034008 |
| GO:0005892  | CC | GO_CC_MM_ACETYLCHOLINE-GATED_CHANNEL_COMPLEX                       | 7  | 2.23607  | 0.034458 |
| GO:0004629  | MF | GO_MF_MM_PHOSPHOLIPASE_C_ACTIVITY                                  | 13 | 0.632456 | 0.035542 |
| GO:00043116 | BP | GO_BP_MM_NEGATIVE_REGULATION_OF_VASCULAR_PERMEABILITY              | 7  | 0.447214 | 0.03621  |
| GO:00045995 | BP | GO_BP_MM_REGULATION_OF_EMBRYONIC_DEVELOPMENT                       | 7  | 1.63299  | 0.03625  |
| GO:0005160  | MF | GO_MF_MM_TRANSFORMING_GROWTH_FACTOR_BETA_RECEPTOR_BINDING          | 5  | 1        | 0.03652  |
| GO:0001965  | MF | GO_MF_MM_G-PROTEIN_ALPHA-SUBUNIT_BINDING                           | 7  | 2.23607  | 0.037856 |
| GO:00017017 | MF | GO_MF_MM_MAP_KINASE_TYROSINE_SERINE_THREONINE_PHOSPHATASE_ACTIVITY | 8  | 0.816497 | 0.03822  |
| GO:0005179  | MF | GO_MF_MM_HORMONE_ACTIVITY                                          | 20 | 1.147079 | 0.038265 |
| GO:0005901  | CC | GO_CC_MM_CAVEOLA                                                   | 22 | 0.534522 | 0.038325 |
| GO:00043204 | CC | GO_CC_MM_PERIKARYON                                                | 27 | 0.39223  | 0.038661 |
| GO:0000062  | MF | GO_MF_MM_FATTY-ACYL-COA_BINDING                                    | 5  | 1.341641 | 0.039161 |
| GO:0005547  | MF | GO_MF_MM_PHOSPHATIDYLINOSITOL-3_4_5-TRISPHOSPHATE_BINDING          | 12 | 0.904534 | 0.039464 |
| GO:0006493  | BP | GO_BP_MM_PROTEIN_O-LINKED_GLYCOSYLATION                            | 6  | 0        | 0.040246 |
| GO:00016331 | BP | GO_BP_MM_MORPHOGENESIS_OF_EMBRYONIC_EPITHELIUM                     | 10 | 0.707107 | 0.041461 |
| GO:00002244 | BP | GO_BP_MM_HEMOPOIETIC_PROGENITOR_CELL_DIFFERENTIATION               | 9  | 2.12132  | 0.04169  |
| GO:00046325 | BP | GO_BP_MM_NEGATIVE_REGULATION_OF_GLUCOSE_IMPORT                     | 5  | 1.34164  | 0.042011 |

|            |    |                                                               |    |          |          |
|------------|----|---------------------------------------------------------------|----|----------|----------|
| GO:0009798 | BP | GO_BP_MM_AXIS_SPECIFICATION                                   | 10 | 0        | 0.042077 |
| GO:0019221 | BP | GO_BP_MM_CYTOKINE-MEDIATED_SIGNALING_PATHWAY                  | 18 | 0.258199 | 0.042382 |
| GO:0004861 | MF | GO_MF_MM_CYCLIN-DEPENDENT_PROTEIN_KINASE_INHIBITOR_ACTIVITY   | 6  | 1.732051 | 0.043699 |
| GO:0004890 | MF | GO_MF_MM_GABA-A_RECEPTOR_ACTIVITY                             | 8  | 0.707107 | 0.044604 |
| GO:0043508 | BP | GO_BP_MM_NEGATIVE_REGULATION_OF_JUN_KINASE_ACTIVITY           | 6  | -0.44721 | 0.044991 |
| GO:0008158 | MF | GO_MF_MM_HEDGEHOG_RECEPTOR_ACTIVITY                           | 5  | 0.447214 | 0.04501  |
| GO:0005865 | CC | GO_CC_MM_STRIATED_MUSCLE_THIN_FILAMENT                        | 5  | 0        | 0.046171 |
| GO:0043401 | BP | GO_BP_MM_STEROID_HORMONE_MEDIATED_SIGNALING_PATHWAY           | 37 | 1.616448 | 0.046869 |
| GO:0009268 | BP | GO_BP_MM_RESPONSE_TO_PH                                       | 6  | 0        | 0.048717 |
| GO:0015813 | BP | GO_BP_MM_L-GLUTAMATE_TRANSPORT                                | 5  | -1       | 0.048817 |
| GO:0007422 | BP | GO_BP_MM_PERIPHERAL_NERVOUS_SYSTEM_DEVELOPMENT                | 20 | 0.727607 | 0.049267 |
| GO:0021895 | BP | GO_BP_MM_CEREBRAL_CORTEX_NEURON_DIFFERENTIATION               | 6  | 0.447214 | 0.049628 |
| GO:0007030 | BP | GO_BP_MM_GOLGI_ORGANIZATION                                   | 13 | 0.83205  | 0.049714 |
| GO:0042098 | BP | GO_BP_MM_T_CELL_PROLIFERATION                                 | 6  | 0.816497 | 0.050112 |
| GO:0046545 | BP | GO_BP_MM_DEVELOPMENT_OF_PRIMARY_FEMALE_SEXUAL_CHARACTERISTICS | 5  | 2        | 0.050233 |
| GO:0007528 | BP | GO_BP_MM_NEUROMUSCULAR_JUNCTION_DEVELOPMENT                   | 14 | -0.63246 | 0.050752 |
| GO:0045861 | BP | GO_BP_MM_NEGATIVE_REGULATION_OF_PROTEOLYSIS                   | 6  | 0        | 0.05246  |
| GO:0021631 | BP | GO_BP_MM_OPTIC_NERVE_MORPHOGENESIS                            | 5  | -0.44721 | 0.053119 |

|                |    |                                                                                   |    |              |              |
|----------------|----|-----------------------------------------------------------------------------------|----|--------------|--------------|
| GO:00<br>01574 | BP | GO_BP_MM_GANGLIOSIDE_BIOSYNTHETI<br>C_PROCESS                                     | 5  | -2           | 0.05356<br>4 |
| GO:00<br>21846 | BP | GO_BP_MM_CELL_PROLIFERATION_IN_F<br>OREBRAIN                                      | 10 | 1.4142<br>14 | 0.05390<br>3 |
| GO:00<br>45786 | BP | GO_BP_MM_NEGATIVE_REGULATION_O<br>F_CELL_CYCLE                                    | 18 | 1.3867<br>5  | 0.05405<br>1 |
| GO:00<br>42523 | BP | GO_BP_MM_POSITIVE_REGULATION_OF<br>_TYROSINE_PHOSPHORYLATION_OF_STA<br>T5_PROTEIN | 5  | 0            | 0.05491<br>6 |
